# Supplementary material for: Respiratory Syncytial Virus Human Experimental Infection Model: Provenance, Production, and Sequence of Low-Passaged Memphis-37 Challenge Virus
Source: PubMed Central journal article supplement (PMC4240712; doi:10.1371/journal.pone.0113100), 2014-11-21
Supplement: pone.0113100.s009.pdf [file pone.0113100.s009.pdf]

# L protein

|                 | 20   | 40  | 60    | 80   | 100  | 120  | 140  | 160  | 180  | 200  | 220  | 240  | 260  | 280  | 300  | 320   | 340  | 360   | 380  | 400  | 420  | 440  | 460  | 480 | 500  |      |      |      |      |      |     |      |     |     |   |     |     |
|-----------------|------|-----|-------|------|------|------|------|------|------|------|------|------|------|------|------|-------|------|-------|------|------|------|------|------|-----|------|------|------|------|------|------|-----|------|-----|-----|---|-----|-----|
| RSVA Memphis-37 | MDPI | I   | NGNSA | NVYL | TD   | SYLK | GVIS | FSE  | CNCA | LGSI | YF   | NGPY | LKND | YTN  | LIS  | RQNPL | IEH  | IN    | LKKN | LIT  | QSL  | ISKY | HKGE | IK  | IEEP | TYF  | QSL  | LMTY | KSM  | TSS  | 100 |      |     |     |   |     |     |
| RSVA Nashville  | .    | .   | .     | .    | .    | .    | .    | .    | .    | .    | .    | .    | .    | .    | .    | .     | .    | .     | .    | .    | .    | .    | .    | .   | .    | .    | .    | .    | .    | .    | 100 |      |     |     |   |     |     |
| RSVA Denver     | .    | .   | S     | .    | .    | .    | .    | .    | .    | .    | .    | .    | .    | .    | .    | .     | .    | .     | .    | .    | .    | .    | .    | .   | .    | .    | .    | .    | .    | .    | 100 |      |     |     |   |     |     |
| RSVA Milwaukee  | .    | .   | .     | .    | .    | .    | .    | .    | .    | .    | .    | .    | .    | .    | .    | .     | .    | .     | .    | .    | .    | .    | .    | .   | .    | .    | .    | .    | .    | .    | 100 |      |     |     |   |     |     |
| RSVA VR-26 Long | .    | .   | .     | .    | .    | .    | .    | .    | .    | .    | .    | .    | .    | .    | .    | .     | .    | .     | .    | .    | .    | .    | .    | .   | .    | .    | .    | .    | .    | .    | 100 |      |     |     |   |     |     |
| RSVA A2         | .    | .   | .     | .    | .    | .    | .    | .    | .    | .    | .    | .    | .    | .    | .    | .     | .    | .     | .    | .    | .    | .    | .    | .   | .    | .    | .    | .    | .    | .    | 100 |      |     |     |   |     |     |
| RSVB Dallas     | .    | .   | .     | .    | .    | .    | .    | .    | .    | .    | .    | .    | .    | .    | .    | .     | .    | .     | .    | .    | .    | .    | .    | .   | .    | .    | .    | .    | .    | .    | 100 |      |     |     |   |     |     |
| RSVB Milwaukee  | .    | .   | .     | .    | .    | .    | .    | .    | .    | .    | .    | .    | .    | .    | .    | .     | .    | .     | .    | .    | .    | .    | .    | .   | .    | .    | .    | .    | .    | .    | 100 |      |     |     |   |     |     |
| RSVB 9320       | .    | .   | .     | .    | .    | .    | .    | .    | .    | .    | .    | .    | .    | .    | .    | .     | .    | .     | .    | .    | .    | .    | .    | .   | .    | .    | .    | .    | .    | .    | 100 |      |     |     |   |     |     |
| RSVB strain B1  | .    | .   | .     | .    | .    | .    | .    | .    | .    | .    | .    | .    | .    | .    | .    | .     | .    | .     | .    | .    | .    | .    | .    | .   | .    | .    | .    | .    | .    | .    | 100 |      |     |     |   |     |     |
| RSVA Memphis-37 | EQI  | TTT | NLLK  | KIIR | RAI  | EIS  | DVKV | YAIL | LNK  | LGLK | EK   | DKIK | SNGQ | DENN | S    | VIT   | I    | KDDI  | LLAV | KDN  | QSH  | LKAG | KNH  | STK | QKDT | IK   | TTLL | KKLM | CSM  | QHP  | 200 |      |     |     |   |     |     |
| RSVA Nashville  | .    | .   | .     | .    | .    | .    | .    | .    | .    | .    | .    | .    | .    | .    | .    | .     | .    | .     | .    | .    | .    | .    | .    | .   | .    | .    | .    | .    | .    | .    | 200 |      |     |     |   |     |     |
| RSVA Denver     | .    | .   | .     | .    | .    | .    | .    | .    | .    | .    | .    | .    | .    | .    | .    | .     | .    | .     | .    | .    | .    | .    | .    | .   | .    | .    | .    | .    | .    | .    | 200 |      |     |     |   |     |     |
| RSVA Milwaukee  | .    | .   | .     | .    | .    | .    | .    | .    | .    | .    | .    | .    | .    | .    | .    | .     | .    | .     | .    | .    | .    | .    | .    | .   | .    | .    | .    | .    | .    | .    | 200 |      |     |     |   |     |     |
| RSVA VR-26 Long | .    | .   | .     | .    | .    | .    | .    | .    | .    | .    | .    | .    | .    | .    | .    | .     | .    | .     | .    | .    | .    | .    | .    | .   | .    | .    | .    | .    | .    | .    | 200 |      |     |     |   |     |     |
| RSVA A2         | .    | .   | .     | .    | .    | .    | .    | .    | .    | .    | .    | .    | .    | .    | .    | .     | .    | .     | .    | .    | .    | .    | .    | .   | .    | .    | .    | .    | .    | .    | 200 |      |     |     |   |     |     |
| RSVB Dallas     | .    | .   | .     | .    | .    | .    | .    | .    | .    | .    | .    | .    | .    | .    | .    | .     | .    | .     | .    | .    | .    | .    | .    | .   | .    | .    | .    | .    | .    | .    | 200 |      |     |     |   |     |     |
| RSVB Milwaukee  | .    | .   | .     | .    | .    | .    | .    | .    | .    | .    | .    | .    | .    | .    | .    | .     | .    | .     | .    | .    | .    | .    | .    | .   | .    | .    | .    | .    | .    | .    | 200 |      |     |     |   |     |     |
| RSVB 9320       | .    | .   | .     | .    | .    | .    | .    | .    | .    | .    | .    | .    | .    | .    | .    | .     | .    | .     | .    | .    | .    | .    | .    | .   | .    | .    | .    | .    | .    | .    | 200 |      |     |     |   |     |     |
| RSVB strain B1  | .    | .   | .     | .    | .    | .    | .    | .    | .    | .    | .    | .    | .    | .    | .    | .     | .    | .     | .    | .    | .    | .    | .    | .   | .    | .    | .    | .    | .    | .    | 200 |      |     |     |   |     |     |
| RSVA Memphis-37 | PSWL | I   | HWF   | NL   | YTKL | NN   | LTQ  | YRSN | EVK  | NKHG | FIL  | DN   | QTLN | GFG  | FIL  | NQYG  | CIVY | HKEL  | KR   | ITVT | TYN  | QFL  | TWKD | ISL | SRL  | NVCL | LIT  | WISN | CLNT | LNK  | SLG | 300  |     |     |   |     |     |
| RSVA Nashville  | .    | .   | .     | .    | .    | .    | .    | .    | .    | .    | .    | .    | .    | .    | .    | .     | .    | .     | .    | .    | .    | .    | .    | .   | .    | .    | .    | .    | .    | .    | .   | .    | .   | 300 |   |     |     |
| RSVA Denver     | .    | .   | .     | .    | .    | S    | .    | .    | .    | .    | .    | .    | .    | .    | .    | .     | .    | .     | .    | .    | .    | .    | .    | .   | .    | .    | .    | .    | .    | .    | .   | .    | .   | 300 |   |     |     |
| RSVA Milwaukee  | .    | .   | .     | .    | .    | .    | .    | .    | .    | .    | .    | .    | .    | .    | .    | .     | .    | .     | .    | .    | .    | .    | .    | .   | .    | .    | .    | .    | .    | .    | .   | .    | .   | 300 |   |     |     |
| RSVA VR-26 Long | .    | .   | .     | .    | .    | .    | .    | .    | .    | .    | .    | .    | .    | .    | .    | .     | .    | .     | .    | .    | .    | .    | .    | .   | .    | .    | .    | .    | .    | .    | .   | .    | .   | 300 |   |     |     |
| RSVA A2         | .    | .   | .     | .    | .    | .    | .    | .    | .    | .    | .    | .    | .    | .    | .    | .     | .    | .     | .    | .    | .    | .    | .    | .   | .    | .    | .    | .    | .    | .    | .   | .    | .   | 300 |   |     |     |
| RSVB Dallas     | .    | .   | .     | .    | .    | .    | .    | .    | .    | .    | .    | .    | .    | .    | .    | .     | .    | .     | .    | .    | .    | .    | .    | .   | .    | .    | .    | .    | .    | .    | .   | .    | .   | 300 |   |     |     |
| RSVB Milwaukee  | .    | .   | .     | .    | .    | .    | .    | .    | .    | .    | .    | .    | .    | .    | .    | .     | .    | .     | .    | .    | .    | .    | .    | .   | .    | .    | .    | .    | .    | .    | .   | .    | .   | 300 |   |     |     |
| RSVB 9320       | .    | .   | .     | .    | .    | .    | .    | .    | .    | .    | .    | .    | .    | .    | .    | .     | .    | .     | .    | .    | .    | .    | .    | .   | .    | .    | .    | .    | .    | .    | .   | .    | .   | 300 |   |     |     |
| RSVB strain B1  | .    | .   | .     | .    | .    | .    | .    | .    | .    | .    | .    | .    | .    | .    | .    | .     | .    | .     | .    | .    | .    | .    | .    | .   | .    | .    | .    | .    | .    | .    | .   | .    | .   | 300 |   |     |     |
| RSVA Memphis-37 | LRCG | FNN | VIL   | TQLF | LYG  | DCI  | LKLF | HN   | EGFY | I    | IKEV | EGF  | I    | SLIL | NITE | EED   | QFRK | RFY   | NSM  | LNNI | TD   | AANK | AQKN | LLS | RV   | HTLL | DKT  | VSD  | NI   | INGR | WII | L    | 400 |     |   |     |     |
| RSVA Nashville  | .    | .   | .     | .    | .    | .    | .    | .    | .    | .    | .    | .    | .    | .    | .    | .     | .    | .     | .    | .    | .    | .    | .    | .   | .    | .    | .    | .    | .    | .    | .   | .    | .   | 400 |   |     |     |
| RSVA Denver     | .    | .   | .     | .    | .    | H    | .    | .    | .    | .    | .    | .    | .    | .    | .    | .     | .    | .     | .    | .    | .    | .    | .    | .   | .    | .    | .    | .    | .    | .    | .   | .    | .   | 400 |   |     |     |
| RSVA Milwaukee  | .    | .   | .     | .    | .    | .    | .    | .    | .    | .    | .    | .    | .    | .    | .    | .     | .    | .     | .    | .    | .    | .    | .    | .   | .    | .    | .    | .    | .    | .    | .   | .    | .   | 400 |   |     |     |
| RSVA VR-26 Long | .    | .   | .     | .    | .    | .    | .    | .    | .    | .    | .    | .    | .    | .    | .    | .     | .    | .     | .    | .    | .    | .    | .    | .   | .    | .    | .    | .    | .    | .    | .   | .    | .   | 400 |   |     |     |
| RSVA A2         | .    | .   | .     | .    | .    | .    | .    | .    | .    | .    | .    | .    | .    | .    | .    | .     | .    | .     | .    | .    | .    | .    | .    | .   | .    | .    | .    | .    | .    | .    | .   | .    | .   | 400 |   |     |     |
| RSVB Dallas     | .    | .   | .     | .    | .    | .    | .    | .    | .    | .    | .    | .    | .    | .    | .    | .     | .    | .     | .    | .    | .    | .    | .    | .   | .    | .    | .    | .    | .    | .    | .   | .    | .   | 400 |   |     |     |
| RSVB Milwaukee  | .    | .   | .     | .    | .    | .    | .    | .    | .    | .    | .    | .    | .    | .    | .    | .     | .    | .     | .    | .    | .    | .    | .    | .   | .    | .    | .    | .    | .    | .    | .   | .    | .   | 400 |   |     |     |
| RSVB 9320       | .    | .   | .     | .    | .    | .    | .    | .    | .    | .    | .    | .    | .    | .    | .    | .     | .    | .     | .    | .    | .    | .    | .    | .   | .    | .    | .    | .    | .    | .    | .   | .    | .   | 400 |   |     |     |
| RSVB strain B1  | .    | .   | .     | .    | .    | .    | .    | .    | .    | .    | .    | .    | .    | .    | .    | .     | .    | .     | .    | .    | .    | .    | .    | .   | .    | .    | .    | .    | .    | .    | .   | .    | .   | 400 |   |     |     |
| RSVA Memphis-37 | LSKF | LKL | IKL   | AGDN | NN   | NNLS | ELYF | LF   | RI   | FG   | HPMV | D    | ER   | QAM  | DAVK | VNC   | NET  | KFYLL | SSL  | LSM  | LRGA | F    | I    | RI  | KG   | FV   | NNY  | NRW  | PTLR | NAI  | VLP | LRLW | TTY | KL  | N | 500 |     |
| RSVA Nashville  | .    | .   | .     | .    | .    | .    | .    | .    | .    | .    | .    | .    | .    | .    | .    | .     | .    | .     | .    | .    | .    | .    | .    | .   | .    | .    | .    | .    | .    | .    | .   | .    | .   | .   | . | .   | 500 |
| RSVA Denver     | .    | .   | .     | .    | .    | .    | .    | .    | .    | .    | .    | .    | .    | .    | .    | .     | .    | .     | .    | .    | .    | .    | .    | .   | .    | .    | .    | .    | .    | .    | .   | .    | .   | .   | . | .   | 500 |
| RSVA Milwaukee  | .    | .   | .     | .    | .    | .    | .    | .    | .    | .    | .    | .    | .    | .    | .    | .     | .    | .     | .    | .    | .    | .    | .    | .   | .    | .    | .    | .    | .    | .    | .   | .    | .   | .   | . | .   | 500 |
| RSVA VR-26 Long | .    | .   | .     | .    | .    | .    | .    | .    | .    | .    | .    | .    | .    | .    | .    | .     | .    | .     | .    | .    | .    | .    | .    | .   | .    | .    | .    | .    | .    | .    | .   | .    | .   | .   | . | .   | 500 |
| RSVA A2         | .    | .   | .     | .    | .    | .    | .    | .    | .    | .    | .    | .    | .    | .    | .    | .     | .    | .     | .    | .    | .    | .    | .    | .   | .    | .    | .    | .    | .    | .    | .   | .    | .   | .   | . | .   | 500 |
| RSVB Dallas     | .    | .   | .     | .    | .    | .    | .    | .    | .    | .    | .    | .    | .    | .    | .    | .     | .    | .     | .    | .    | .    | .    | .    | .   | .    | .    | .    | .    | .    | .    | .   | .    | .   | .   | . | .   | 500 |
| RSVB Milwaukee  | .    | .   | .     | .    | .    | .    | .    | .    | .    | .    | .    | .    | .    | .    | .    | .     | .    | .     | .    | .    | .    | .    | .    | .   | .    | .    | .    | .    | .    | .    | .   | .    | .   | .   | . | .   | 500 |
| RSVB 9320       | .    | .   | .     | .    | .    | .    | .    | .    | .    | .    | .    | .    | .    | .    | .    | .     | .    | .     | .    | .    | .    | .    | .    | .   | .    | .    | .    | .    | .    | .    | .   | .    | .   | .   | . | .   | 500 |
| RSVB strain B1  | .    | .   | .     | .    | .    | .    | .    | .    | .    | .    | .    | .    | .    | .    | .    | .     | .    | .     | .    | .    | .    | .    | .    | .   | .    | .    | .    | .    | .    | .    | .   | .    | .   | .   | . | .   | 500 |

   Variable region

# L protein

|                 |                     |                     |                     |                     |                     |                     |                     |                     |                     |                     |      |      |
|-----------------|---------------------|---------------------|---------------------|---------------------|---------------------|---------------------|---------------------|---------------------|---------------------|---------------------|------|------|
|                 |                     | 520                 |                     | 540                 |                     | 560                 |                     | 580                 |                     | 600                 |      |      |
| RSVA Memphis-37 | TYP S L L E L T E   | R D L I V L S G L R | F Y R E F R L P K K | V D L E M I I N D K | A I S P P K N L I W | T S F P R N Y M P S | H I Q N Y I E H E K | L K F S E S D K S R | R V L E Y Y L R D N | K F N E C D L Y N C | 600  |      |
| RSVA Nashville  | .                   | .                   | .                   | .                   | .                   | .                   | .                   | .                   | .                   | .                   | 600  |      |
| RSVA Denver     | .                   | .                   | .                   | .                   | .                   | .                   | .                   | .                   | .                   | .                   | 600  |      |
| RSVA Milwaukee  | .                   | .                   | .                   | .                   | .                   | .                   | .                   | .                   | .                   | .                   | 600  |      |
| RSVA VR-26 Long | .                   | .                   | .                   | .                   | .                   | .                   | .                   | .                   | .                   | .                   | 600  |      |
| RSVA A2         | .                   | .                   | .                   | .                   | .                   | .                   | .                   | .                   | .                   | .                   | 600  |      |
| RSVB Dallas     | .                   | I                   | N                   | I                   | H                   | .                   | D                   | .                   | R                   | .                   | 600  |      |
| RSVB Milwaukee  | .                   | I                   | N                   | I                   | H                   | .                   | D                   | .                   | R                   | .                   | 600  |      |
| RSVB 9320       | .                   | I                   | N                   | I                   | H                   | .                   | D                   | .                   | R                   | .                   | 600  |      |
| RSVB strain B1  | .                   | I                   | N                   | I                   | H                   | .                   | D                   | .                   | R                   | .                   | 600  |      |
|                 |                     | 620                 |                     | 640                 |                     | 660                 |                     | 680                 |                     | 700                 |      |      |
| RSVA Memphis-37 | V V N Q S Y L N N P | N H V V S L T G K E | R E L S V G R M F A | M O P G M F R Q V Q | I L A E K M I A E N | I L Q F F P E S L T | R Y G D L E L Q K I | L E L K A G I S N K | S N R Y N D N Y N N | Y I S K C S I I T D | 700  |      |
| RSVA Nashville  | .                   | .                   | .                   | .                   | .                   | .                   | .                   | .                   | .                   | .                   | 700  |      |
| RSVA Denver     | .                   | .                   | .                   | .                   | .                   | .                   | .                   | .                   | .                   | .                   | 700  |      |
| RSVA Milwaukee  | .                   | .                   | .                   | .                   | .                   | .                   | .                   | .                   | .                   | .                   | 700  |      |
| RSVA VR-26 Long | .                   | .                   | .                   | .                   | .                   | .                   | .                   | .                   | .                   | .                   | 700  |      |
| RSVA A2         | .                   | .                   | .                   | .                   | .                   | .                   | .                   | .                   | .                   | .                   | 700  |      |
| RSVB Dallas     | .                   | .                   | S                   | .                   | I                   | .                   | .                   | .                   | .                   | .                   | 700  |      |
| RSVB Milwaukee  | .                   | .                   | S                   | .                   | I                   | .                   | .                   | .                   | .                   | .                   | 700  |      |
| RSVB 9320       | .                   | .                   | S                   | .                   | I                   | .                   | .                   | .                   | .                   | .                   | 700  |      |
| RSVB strain B1  | .                   | .                   | S                   | .                   | I                   | .                   | .                   | .                   | .                   | .                   | 700  |      |
|                 |                     | 720                 |                     | 740                 |                     | 760                 |                     | 780                 |                     | 800                 |      |      |
| RSVA Memphis-37 | L S K F N Q A F R Y | E T S C I C S D V L | D E L H G V Q S L F | S W L H L T I P H V | T I I C T Y R H A P | P Y I R D H I V D L | N N V D E Q S G L Y | R Y H M G G I E G W | C Q K L W T I E A I | S L L D L I S L K G | 800  |      |
| RSVA Nashville  | .                   | .                   | .                   | .                   | .                   | .                   | .                   | .                   | .                   | .                   | 800  |      |
| RSVA Denver     | .                   | .                   | .                   | .                   | .                   | .                   | .                   | .                   | .                   | .                   | 800  |      |
| RSVA Milwaukee  | .                   | .                   | .                   | .                   | .                   | .                   | .                   | .                   | .                   | .                   | 800  |      |
| RSVA VR-26 Long | .                   | .                   | .                   | .                   | .                   | .                   | .                   | .                   | .                   | .                   | 800  |      |
| RSVA A2         | .                   | .                   | .                   | .                   | .                   | .                   | .                   | .                   | .                   | .                   | 800  |      |
| RSVB Dallas     | .                   | .                   | .                   | .                   | L                   | F                   | K                   | V                   | N                   | E                   | 800  |      |
| RSVB Milwaukee  | .                   | .                   | .                   | .                   | L                   | F                   | K                   | V                   | N                   | E                   | 800  |      |
| RSVB 9320       | .                   | .                   | .                   | .                   | L                   | F                   | K                   | V                   | N                   | E                   | 800  |      |
| RSVB strain B1  | .                   | .                   | .                   | .                   | L                   | F                   | K                   | V                   | N                   | E                   | 800  |      |
|                 |                     | 820                 |                     | 840                 |                     | 860                 |                     | 880                 |                     | 900                 |      |      |
| RSVA Memphis-37 | K F S I T A L I N G | D N Q S I D I S K P | V R L M E G O T H A | Q A D Y L L A L N S | L K L L Y K E Y A G | I G H K L K G T E T | Y I S R D M Q F M S | K T I Q H N G V Y Y | P A S I K K V L R V | G P W I N T I L D D | 900  |      |
| RSVA Nashville  | .                   | .                   | .                   | .                   | .                   | .                   | .                   | .                   | .                   | .                   | 900  |      |
| RSVA Denver     | .                   | .                   | .                   | .                   | .                   | .                   | .                   | .                   | .                   | .                   | 900  |      |
| RSVA Milwaukee  | .                   | .                   | I                   | .                   | .                   | .                   | .                   | .                   | .                   | .                   | 900  |      |
| RSVA VR-26 Long | .                   | .                   | I                   | .                   | .                   | .                   | .                   | .                   | .                   | .                   | 900  |      |
| RSVA A2         | .                   | .                   | I                   | .                   | .                   | .                   | .                   | .                   | .                   | .                   | 900  |      |
| RSVB Dallas     | .                   | .                   | .                   | .                   | I                   | .                   | .                   | .                   | .                   | .                   | 900  |      |
| RSVB Milwaukee  | .                   | .                   | .                   | .                   | I                   | .                   | .                   | .                   | .                   | .                   | 900  |      |
| RSVB 9320       | .                   | .                   | .                   | .                   | I                   | .                   | .                   | .                   | .                   | .                   | 900  |      |
| RSVB strain B1  | .                   | .                   | .                   | .                   | I                   | .                   | .                   | .                   | .                   | .                   | 900  |      |
|                 |                     | 920                 |                     | 940                 |                     | 960                 |                     | 980                 |                     | 1,000               |      |      |
| RSVA Memphis-37 | F K V S L E S I G S | L T Q E L E Y R G E | S L L C S L I F R N | V W L Y N Q I A L Q | L K N H A L C N N K | L Y L D I L K V L K | H L K T F F N L D N | I D T A L T L Y M N | L P M L F G G G D P | N L L Y R S F Y R R | 1000 |      |
| RSVA Nashville  | .                   | .                   | .                   | .                   | .                   | .                   | .                   | .                   | .                   | .                   | 1000 |      |
| RSVA Denver     | .                   | .                   | .                   | .                   | .                   | .                   | .                   | .                   | .                   | .                   | 1000 |      |
| RSVA Milwaukee  | .                   | .                   | .                   | .                   | .                   | .                   | .                   | .                   | .                   | .                   | 1000 |      |
| RSVA VR-26 Long | .                   | .                   | .                   | .                   | .                   | .                   | .                   | .                   | .                   | .                   | 1000 |      |
| RSVA A2         | .                   | .                   | .                   | .                   | .                   | .                   | .                   | .                   | .                   | .                   | 1000 |      |
| RSVB Dallas     | .                   | .                   | .                   | .                   | I                   | R                   | .                   | .                   | S                   | S                   | 1000 |      |
| RSVB Milwaukee  | .                   | .                   | .                   | .                   | I                   | R                   | .                   | .                   | S                   | S                   | 1000 |      |
| RSVB 9320       | .                   | .                   | .                   | .                   | I                   | R                   | .                   | .                   | S                   | S                   | 1000 |      |
| RSVB strain B1  | .                   | .                   | .                   | .                   | I                   | R                   | .                   | H                   | S                   | M                   | S    | 1000 |
|                 |                     |                     |                     |                     |                     |                     |                     |                     | S                   | M                   | S    | 1000 |

# L protein

|                 |            |             |             |            |            |            |            |             |            |            |      |      |
|-----------------|------------|-------------|-------------|------------|------------|------------|------------|-------------|------------|------------|------|------|
|                 | 1,020      | 1,040       | 1,060       | 1,080      | 1,100      |            |            |             |            |            |      |      |
| RSVA Memphis-37 | TPDFLTEAIV | HSVFILSYT   | NHDLKDKLQD  | LSDDRNLNKF | LCIITFDKNP | NAEFVTLMRD | PQALGSERQA | KITSEINRLA  | VTEVLSTAPN | KIFSKSAQHY | 1100 |      |
| RSVA Nashville  |            | V           |             |            |            |            |            |             | I          |            | 1100 |      |
| RSVA Denver     |            |             |             |            |            |            |            |             |            |            | 1100 |      |
| RSVA Milwaukee  |            |             |             |            |            |            |            |             |            |            | 1100 |      |
| RSVA VR-26 Long |            |             |             |            |            |            |            |             |            |            | 1100 |      |
| RSVA A2         |            |             |             |            |            |            |            |             |            |            | 1100 |      |
| RSVB Dallas     |            | V           | G           | Q          | P          | V          |            |             | I          |            | 1100 |      |
| RSVB Milwaukee  |            | V           | G           | X          | P          | V          |            |             | I          |            | 1100 |      |
| RSVB 9320       |            | V           | G           | Q          | P          |            |            |             | I          |            | 1100 |      |
| RSVB strain B1  |            | V           | G           | Q          | P          | V          |            |             | I          |            | 1100 |      |
|                 | 1,120      | 1,140       | 1,160       | 1,180      | 1,200      |            |            |             |            |            |      |      |
| RSVA Memphis-37 | TTTEIDLNDI | MQNIEPTYPH  | GLRVVYESLP  | FYKAEKIVNL | ISGTKSITNI | LEKTSALDIT | DIDRATEMMR | KNITLLIRIF  | PLDCNRDKRE | ILSMENLSIT | 1200 |      |
| RSVA Nashville  |            |             |             |            |            |            | V          |             |            |            | 1200 |      |
| RSVA Denver     |            |             |             |            |            |            |            | LL          |            |            | 1200 |      |
| RSVA Milwaukee  |            |             |             |            |            |            |            | L           |            |            | 1200 |      |
| RSVA VR-26 Long |            |             |             |            |            |            |            | L           |            |            | 1200 |      |
| RSVA A2         |            |             |             |            |            |            |            | L           |            |            | 1200 |      |
| RSVB Dallas     |            |             |             |            |            | T          | N          | D           | L          | K          | L    | 1200 |
| RSVB Milwaukee  |            |             |             |            |            | T          | N          | D           | L          | K          | L    | 1200 |
| RSVB 9320       |            |             |             |            |            | T          | N          | D           | L          | K          | L    | 1200 |
| RSVB strain B1  |            |             |             |            |            | T          | N          | D           | L          | K          | L    | 1200 |
|                 | 1,220      | 1,240       | 1,260       | 1,280      | 1,300      |            |            |             |            |            |      |      |
| RSVA Memphis-37 | ELSKYVRERS | WLSLNI VGT  | SPS IMYTMDI | KYTTSTIASG | IIIEKYNVNS | LTRGERGPTK | PWVGSSTQEK | KTMPVYNRQV  | LTKQRDQID  | LLAKLDWVYA | 1300 |      |
| RSVA Nashville  |            |             |             |            |            |            |            |             |            |            | 1300 |      |
| RSVA Denver     |            |             |             |            |            |            |            |             |            |            | 1300 |      |
| RSVA Milwaukee  |            |             |             | S          |            |            |            |             |            |            | 1300 |      |
| RSVA VR-26 Long |            |             |             |            |            |            |            |             |            |            | 1300 |      |
| RSVA A2         |            |             |             | S          |            |            |            |             |            |            | 1300 |      |
| RSVB Dallas     |            |             | F           |            |            |            | G          |             |            |            | 1300 |      |
| RSVB Milwaukee  |            |             | F           |            |            |            | G          |             |            |            | 1300 |      |
| RSVB 9320       |            |             | F           |            |            |            |            |             |            |            | 1300 |      |
| RSVB strain B1  |            |             | F           |            |            |            |            |             |            |            | 1300 |      |
|                 | 1,320      | 1,340       | 1,360       | 1,380      | 1,400      |            |            |             |            |            |      |      |
| RSVA Memphis-37 | SIDNKDEFME | ELSIGTLGLT  | YEKAKKLFQ   | YLSVNYLHRL | TVSSRPCEFP | ASIPAYRRTN | YHFDTSPINR | ILTEKYGDED  | IDIVFQNCIS | FGLSLMSVVE | 1400 |      |
| RSVA Nashville  |            |             |             |            |            |            |            |             |            |            | 1400 |      |
| RSVA Denver     |            |             |             |            |            |            |            |             |            |            | 1400 |      |
| RSVA Milwaukee  |            |             |             |            |            |            |            |             |            |            | 1400 |      |
| RSVA VR-26 Long |            |             |             |            |            |            |            |             |            |            | 1400 |      |
| RSVA A2         |            |             |             |            |            |            |            |             |            |            | 1400 |      |
| RSVB Dallas     | V          | T           | S           |            |            |            |            | H           | V          |            | 1400 |      |
| RSVB Milwaukee  | T          | T           | S           |            |            |            |            | H           | L          |            | 1400 |      |
| RSVB 9320       | T          | T           | S           |            |            |            |            | H           | V          |            | 1400 |      |
| RSVB strain B1  | T          | T           | S           |            |            |            |            | H           | V          |            | 1400 |      |
|                 | 1,420      | 1,440       | 1,460       | 1,480      | 1,500      |            |            |             |            |            |      |      |
| RSVA Memphis-37 | QFTNVCPNRI | ILIPKLN EIH | LMKPPIFTGD  | VDIHLKQVI  | QKQHMFLPKD | ISLTQYVELF | LSNKTLKSGS | HVNSNLI LAH | KISDYFHNTY | ILSTNLAGHW | 1500 |      |
| RSVA Nashville  |            |             |             |            |            |            |            |             |            |            | 1500 |      |
| RSVA Denver     | A          |             |             |            |            |            |            | N           |            |            | 1500 |      |
| RSVA Milwaukee  |            |             |             |            |            |            |            |             |            |            | 1500 |      |
| RSVA VR-26 Long |            |             |             |            |            |            |            |             |            |            | 1500 |      |
| RSVA A2         |            |             |             |            |            |            |            |             |            |            | 1500 |      |
| RSVB Dallas     | I          |             |             | I          |            |            | A          | I           | V          | M          | A    | 1500 |
| RSVB Milwaukee  | I          |             |             | I          |            |            | A          | I           | V          | M          | A    | 1500 |
| RSVB 9320       | I          |             |             | I          |            |            | A          | I           | V          | M          | D    | 1500 |
| RSVB strain B1  | I          |             |             | I          |            |            | A          | N           | V          | M          | A    | 1500 |

# L protein

|                 | 1,520      | 1,540      | 1,560      | 1,580      | 1,600      |            |            |            |            |            |            |            |      |      |      |   |   |      |
|-----------------|------------|------------|------------|------------|------------|------------|------------|------------|------------|------------|------------|------------|------|------|------|---|---|------|
| RSVA Memphis-37 | ILIIQLMKDS | KGIFEKDWGE | GYITDHMFIN | LKVFFNAYKT | YLLCFHKGYG | RAKLECDMNT | SDLLCVLELI | DSSYWKSMSK | VFLEQVKIYK | ILSODASLHR | 1600       |            |      |      |      |   |   |      |
| RSVA Nashville  | .          | .          | .          | .          | .          | .          | .          | .          | .          | .          | 1600       |            |      |      |      |   |   |      |
| RSVA Denver     | .          | .          | .          | .          | S          | .          | .          | .          | .          | S          | 1600       |            |      |      |      |   |   |      |
| RSVA Milwaukee  | .          | .          | .          | .          | .          | K          | .          | .          | .          | .          | 1600       |            |      |      |      |   |   |      |
| RSVA VR-26 Long | .          | .          | .          | .          | .          | K          | .          | .          | .          | .          | 1600       |            |      |      |      |   |   |      |
| RSVA A2         | .          | .          | .          | .          | .          | K          | .          | .          | .          | .          | 1600       |            |      |      |      |   |   |      |
| RSVB Dallas     | .          | .          | .          | N          | .          | R          | .          | .          | .          | VN         | T          | 1600       |      |      |      |   |   |      |
| RSVB Milwaukee  | .          | .          | .          | N          | .          | R          | .          | .          | .          | VN         | T          | 1600       |      |      |      |   |   |      |
| RSVB 9320       | .          | .          | .          | N          | .          | .          | .          | .          | .          | VN         | T          | 1600       |      |      |      |   |   |      |
| RSVB strain B1  | .          | .          | .          | N          | .          | .          | .          | .          | .          | VN         | T          | 1600       |      |      |      |   |   |      |
|                 | 1,620      | 1,640      | 1,660      | 1,680      | 1,700      |            |            |            |            |            |            |            |      |      |      |   |   |      |
| RSVA Memphis-37 | VKGCHSFKLW | FLKRLNVAEF | TVCPVWVNID | YHPTHMKAIL | TYIDLVRMGL | INIDRIYIKN | KHKFNDEFYT | SNLFYINYNF | SDNTHLLTKH | IRIANSELEN | 1700       |            |      |      |      |   |   |      |
| RSVA Nashville  | .          | .          | .          | .          | .          | .          | .          | .          | .          | .          | 1700       |            |      |      |      |   |   |      |
| RSVA Denver     | .          | .          | .          | .          | .          | .          | .          | .          | .          | C          | 1700       |            |      |      |      |   |   |      |
| RSVA Milwaukee  | .          | .          | .          | .          | .          | .          | H          | .          | .          | .          | 1700       |            |      |      |      |   |   |      |
| RSVA VR-26 Long | .          | .          | .          | .          | .          | .          | H          | .          | .          | .          | 1700       |            |      |      |      |   |   |      |
| RSVA A2         | .          | .          | .          | .          | .          | .          | H          | .          | .          | .          | 1700       |            |      |      |      |   |   |      |
| RSVB Dallas     | I          | .          | N          | K          | .          | S          | .          | V          | KLT        | N          | S          | Q          | D    | 1700 |      |   |   |      |
| RSVB Milwaukee  | I          | .          | N          | K          | .          | S          | .          | V          | KLT        | N          | S          | Q          | D    | 1700 |      |   |   |      |
| RSVB 9320       | I          | .          | N          | K          | .          | S          | .          | V          | KLT        | N          | S          | Q          | D    | 1700 |      |   |   |      |
| RSVB strain B1  | I          | .          | N          | K          | .          | S          | .          | V          | KLT        | N          | S          | Q          | D    | 1700 |      |   |   |      |
|                 | 1,720      | 1,740      | 1,760      | 1,780      | 1,800      |            |            |            |            |            |            |            |      |      |      |   |   |      |
| RSVA Memphis-37 | NYNKLYHPTP | ETLENILTNP | VKCDKKTLN  | DYCIIGNVDS | IMLPLLSNKK | LIKSTMI    | R          | TNYS       | KODLYN     | LFPTVVIDKI | IDHSGNTAKS | NQLYTTTSHQ | 1799 |      |      |   |   |      |
| RSVA Nashville  | .          | .          | .          | .          | .          | .          | .          | .          | R          | .          | .          | .          | 1799 |      |      |   |   |      |
| RSVA Denver     | .          | .          | .          | .          | .          | S          | .          | .          | R          | .          | .          | .          | 1799 |      |      |   |   |      |
| RSVA Milwaukee  | .          | .          | A          | .          | I          | SN         | .          | .          | .          | M          | R          | .          | 1799 |      |      |   |   |      |
| RSVA VR-26 Long | .          | .          | A          | .          | I          | SN         | .          | .          | .          | M          | R          | .          | 1799 |      |      |   |   |      |
| RSVA A2         | .          | .          | A          | .          | I          | SN         | .          | .          | .          | M          | R          | .          | 1799 |      |      |   |   |      |
| RSVB Dallas     | .          | .          | SLI        | .          | SNRRNKPK   | -F         | SG         | TE         | M          | TSTFF      | M          | H          | VTT  | F    | R    | A | R | 1799 |
| RSVB Milwaukee  | .          | .          | SLI        | .          | SNRRNKPK   | -F         | SG         | TE         | M          | TSTF       | M          | Q          | VTT  | F    | R    | . | E | 1799 |
| RSVB 9320       | .          | .          | MSLI       | .          | SNNSNKPK   | -S         | SG         | TE         | M          | TSTF       | M          | H          | VTT  | F    | R    | . | I | 1799 |
| RSVB strain B1  | .          | .          | SLI        | .          | SNNSNKPK   | -F         | SG         | TE         | M          | STF        | M          | H          | VTT  | F    | .    | N | R | 1799 |
|                 | 1,820      | 1,840      | 1,860      | 1,880      | 1,900      |            |            |            |            |            |            |            |      |      |      |   |   |      |
| RSVA Memphis-37 | ISLVHNSTSL | YCMPLWHHIN | RNFVFSSTG  | CKISIEYILK | DLKIKDPNCI | AFIGEGAGNL | LLRTVVELHP | DIKYIYRSLK | DCNDHSLPIE | FLRLYNGHIN | 1899       |            |      |      |      |   |   |      |
| RSVA Nashville  | .          | .          | .          | .          | .          | .          | .          | R          | .          | .          | 1899       |            |      |      |      |   |   |      |
| RSVA Denver     | .          | .          | .          | .          | .          | .          | .          | R          | .          | .          | 1899       |            |      |      |      |   |   |      |
| RSVA Milwaukee  | .          | .          | .          | .          | .          | .          | .          | R          | .          | .          | 1899       |            |      |      |      |   |   |      |
| RSVA VR-26 Long | .          | .          | .          | .          | .          | .          | .          | R          | .          | .          | 1899       |            |      |      |      |   |   |      |
| RSVA A2         | .          | .          | .          | .          | .          | .          | .          | R          | .          | .          | 1899       |            |      |      |      |   |   |      |
| RSVB Dallas     | T          | .          | R          | .          | A          | .          | .          | .          | .          | .          | 1899       |            |      |      |      |   |   |      |
| RSVB Milwaukee  | T          | .          | R          | .          | A          | .          | .          | .          | .          | .          | 1899       |            |      |      |      |   |   |      |
| RSVB 9320       | T          | .          | R          | .          | A          | .          | .          | .          | .          | .          | 1899       |            |      |      |      |   |   |      |
| RSVB strain B1  | T          | .          | R          | .          | A          | .          | .          | .          | .          | .          | 1899       |            |      |      |      |   |   |      |
|                 | 1,920      | 1,940      | 1,960      | 1,980      | 2,000      |            |            |            |            |            |            |            |      |      |      |   |   |      |
| RSVA Memphis-37 | IDYGENLTIP | ATDATNNIHW | SYLHIKFAEP | ISLFCDAEL  | PVTVNWSKI  | I          | IEWSKHVRKC | KYCSSVNKCT | LIVKYHAQDD | IDFKLDNITI | LKTYVCLGSK | 1999       |      |      |      |   |   |      |
| RSVA Nashville  | .          | .          | .          | .          | .          | .          | A          | I          | .          | .          | .          | 1999       |      |      |      |   |   |      |
| RSVA Denver     | .          | .          | .          | .          | .          | .          | .          | .          | .          | N          | .          | 1999       |      |      |      |   |   |      |
| RSVA Milwaukee  | .          | .          | .          | .          | .          | .          | .          | .          | .          | .          | .          | 1999       |      |      |      |   |   |      |
| RSVA VR-26 Long | .          | .          | .          | .          | .          | .          | S          | .          | .          | M          | .          | 1999       |      |      |      |   |   |      |
| RSVA A2         | .          | .          | .          | .          | .          | .          | .          | .          | .          | .          | .          | 1999       |      |      |      |   |   |      |
| RSVB Dallas     | .          | .          | .          | .          | .          | .          | S          | .          | .          | M          | .          | 1999       |      |      |      |   |   |      |
| RSVB Milwaukee  | .          | .          | .          | .          | .          | .          | I          | .          | .          | A          | .          | R          | I    | A    | 1999 |   |   |      |
| RSVB 9320       | .          | .          | .          | .          | .          | .          | I          | .          | .          | A          | .          | R          | I    | A    | 1999 |   |   |      |
| RSVB strain B1  | .          | .          | .          | .          | .          | .          | I          | .          | .          | A          | .          | R          | I    | A    | 1999 |   |   |      |

Variable region

# L protein

|                 |              | 2,020         |             | 2,040       |             | 2,060       |                 | 2,080             |            | 2,100      |      |
|-----------------|--------------|---------------|-------------|-------------|-------------|-------------|-----------------|-------------------|------------|------------|------|
| RSVA Memphis-37 | LKGSEVYLVL   | TIGPANVFPV    | FNVVQNAKLI  | LSRTKNFIMP  | KKADKESIDA  | NIKSLIPFLC  | YPITKKGINT      | ALSKLKSVVS        | GDILSYSIAG | RNEVFSNKLI | 2099 |
| RSVA Nashville  | .....        | .....         | .....       | .....       | .....       | .....       | .....           | .....             | .....      | .....      | 2099 |
| RSVA Denver     | .....        | .....         | .....       | .....       | .....       | .....       | .....           | .....             | .....      | .....      | 2099 |
| RSVA Milwaukee  | .....        | .....I.....   | .....       | .....       | .....       | .....       | .....           | .....             | .....      | .....      | 2099 |
| RSVA VR-26 Long | .....        | .....I.....   | .....       | .....       | .....       | .....       | .....           | .....             | .....      | .....      | 2099 |
| RSVA A2         | .....        | .....I.....   | .....       | .....       | .....       | .....       | .....           | .....             | .....      | .....      | 2099 |
| RSVB Dallas     | .....        | .....IL.....  | .....D..... | .....       | .....I..... | .....G..... | .....N.K.....   | .....S.....N..... | .....      | .....      | 2099 |
| RSVB Milwaukee  | .....        | .....IL.....  | .....D..... | .....       | .....I..... | .....       | .....N.K.....   | .....S.....N..... | .....      | .....      | 2099 |
| RSVB 9320       | .....        | .....SIL..... | .....       | .....       | .....T..... | .....       | .....K.....     | .....S.....N..... | .....      | .....      | 2099 |
| RSVB strain B1  | .....        | .....IL.....  | .....D..... | F.....      | .....T..... | .....       | .....K.....     | .....S.....N..... | .....      | .....      | 2099 |
|                 |              | 2,120         |             | 2,140       |             | 2,160       |                 |                   |            |            |      |
| RSVA Memphis-37 | NHKHMN I LKW | FNHVLNFRST    | ELNYNHLYMV  | ESTYPYLSEL  | LNSLTTNELK  | KLIKITGSLL  | YNFHNE *        | 2166              |            |            |      |
| RSVA Nashville  | .....        | .....         | .....       | .....       | .....       | .....       | .....           | - 2165            |            |            |      |
| RSVA Denver     | .....        | .....         | .....       | .....H..... | .....       | .....       | .....N.....     | - 2165            |            |            |      |
| RSVA Milwaukee  | .....        | .....         | .....       | .....       | .....       | .....       | .....           | - 2165            |            |            |      |
| RSVA VR-26 Long | .....        | .....         | .....       | .....       | .....       | .....       | .....           | - 2165            |            |            |      |
| RSVA A2         | .....        | .....         | .....       | .....       | .....       | .....       | .....           | 2166              |            |            |      |
| RSVB Dallas     | .....        | LD.....A..... | .....I..... | .....       | .....       | .....V..... | .....LL..Q..... | 2166              |            |            |      |
| RSVB Milwaukee  | .....        | L.....A.....  | .....I..... | .....       | .....       | .....V..... | .....LP..Q..... | 2166              |            |            |      |
| RSVB 9320       | .....        | LD.....A..... | .....I..... | .....       | .....       | .....V..... | .....LP..Q..... | 2166              |            |            |      |
| RSVB strain B1  | .....        | LD.....A..... | .....I..... | .....       | .....       | .....V..... | .....LP..Q..... | 2166              |            |            |      |
